# Supplementary material for: NTSMDA: prediction of miRNA–disease associations by integrating network topological similarity
Source: Royal Society of Chemistry journal article supplement (doi:10.1039/c6mb00049e), 2016-04-26
Supplement: c6mb00049e1.pdf [file c6mb00049e1.pdf]

**Figure S1. Degree distributions for diseases and miRNAs in the disease-miRNA association network.** The left panel shows the bar diagram of the degree distributions of disease. The right panel shows the bar diagram of the degree distributions of miRNAs.

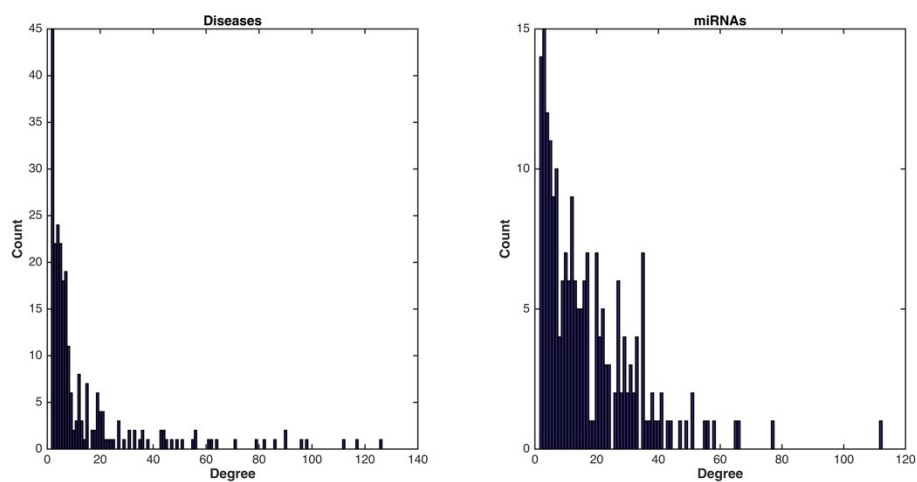

Figure S2. Prediction performance affected by  $\alpha$  value,  $\beta$  value.

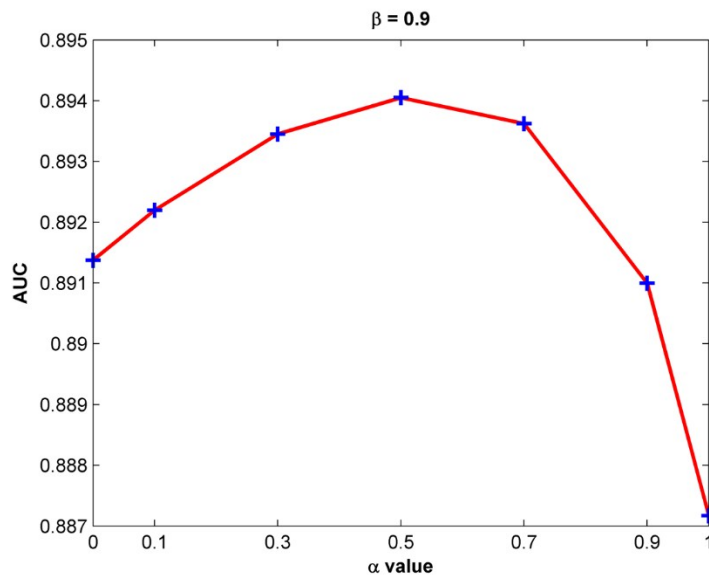

(A) AUC of leave-one-out cross validation affected by  $\alpha$  value when  $\beta=0.9$

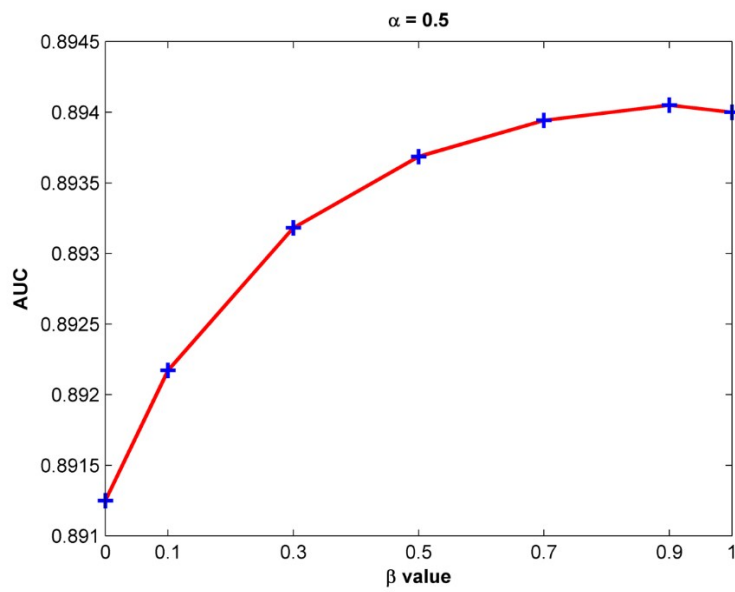

(B) AUC of leave-one-out cross validation affected by  $\beta$  value when  $\alpha=0.5$

**Figure S3.** The ROC curves for NTSMDA and other methods for 12 diseases. The value in the bracket is the area under NTSMDA's ROC curve for the specific disease.

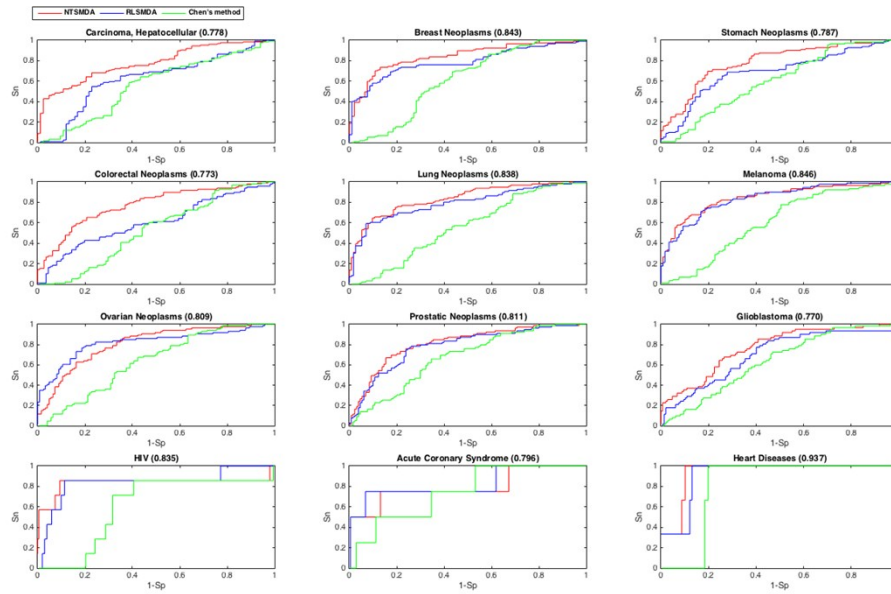

**Table S1.** The top 30 potential miRNAs of lung neoplasms predicted by NTSMDA and the confirmation for their associations by various databases and literature. all the top 30 miRNAs have been confirmed to be related with lung neoplasms.

| Rank | miRNA name   | Evidence                  | Rank | miRNA name   | Evidence                  |
|------|--------------|---------------------------|------|--------------|---------------------------|
| 1    | hsa-mir-15a  | PhenomiR2.0,<br>miRCancer | 16   | hsa-mir-373  | PhenomiR2.0               |
| 2    | hsa-mir-106b | PhenomiR2.0               | 17   | hsa-mir-149  | PhenomiR2.0               |
| 3    | hsa-mir-195  | PhenomiR2.0,<br>miRCancer | 18   | hsa-mir-302b | PhenomiR2.0               |
| 4    | hsa-mir-15b  | PhenomiR2.0,<br>miRCancer | 19   | hsa-mir-296  | PhenomiR2.0               |
| 5    | hsa-mir-141  | PhenomiR2.0,<br>miRCancer | 20   | hsa-mir-302a | PhenomiR2.0               |
| 6    | hsa-mir-122  | PhenomiR2.0               | 21   | hsa-mir-10a  | PhenomiR2.0               |
| 7    | hsa-mir-99a  | PhenomiR2.0               | 22   | hsa-mir-152  | PhenomiR2.0               |
| 8    | hsa-mir-193b | PhenomiR2.0               | 23   | hsa-mir-92b  | PhenomiR2.0               |
| 9    | hsa-mir-429  | miRCancer                 | 24   | hsa-mir-302c | PhenomiR2.0               |
| 10   | hsa-mir-23b  | PhenomiR2.0               | 25   | hsa-mir-139  | PhenomiR2.0               |
| 11   | hsa-mir-130a | PhenomiR2.0               | 26   | hsa-mir-328  | PhenomiR2.0               |
| 12   | hsa-mir-20b  | PhenomiR2.0               | 27   | hsa-mir-181d | PhenomiR2.0,<br>miRCancer |
| 13   | hsa-mir-342  | PhenomiR2.0               | 28   | hsa-mir-372  | PhenomiR2.0               |
| 14   | hsa-mir-196b | PhenomiR2.0               | 29   | hsa-mir-367  | PhenomiR2.0               |
| 15   | hsa-mir-204  | PhenomiR2.0               | 30   | hsa-mir-144  | PhenomiR2.0,<br>miRCancer |

**Table S2.** The top 30 potential miRNAs of prostatic neoplasms predicted by NTSMDA and the confirmation for their associations by various databases and literature. 29 of the top 30 miRNAs have been confirmed to be related with prostatic neoplasms. The only 1 miRNA was unconfirmed (Rank 19).

| Rank | miRNA name   | Evidence               | Rank | miRNA name   | Evidence                            |
|------|--------------|------------------------|------|--------------|-------------------------------------|
| 1    | hsa-mir-155  | miRCancer, PhenomiR2.0 | 16   | hsa-mir-30b  | miRCancer, PhenomiR2.0              |
| 2    | hsa-mir-18a  | miRCancer, PhenomiR2.0 | 17   | hsa-mir-192  | dbDEMC                              |
| 3    | hsa-mir-19a  | PhenomiR2.0            | 18   | hsa-mir-23a  | miRCancer, PhenomiR2.0              |
| 4    | hsa-mir-29c  | PhenomiR2.0            | 19   | hsa-mir-20b  | Unconfirmed                         |
| 5    | hsa-mir-210  | PhenomiR2.0            | 20   | hsa-mir-206  | PhenomiR2.0                         |
| 6    | hsa-mir-142  | PhenomiR2.0            | 21   | hsa-mir-18b  | PMID: 23383988                      |
| 7    | hsa-let-7e   | PhenomiR2.0            | 22   | hsa-mir-140  | dbDEMC                              |
| 8    | hsa-mir-150  | PhenomiR2.0            | 23   | hsa-mir-342  | PhenomiR2.0                         |
| 9    | hsa-mir-30a  | PhenomiR2.0            | 24   | hsa-mir-302b | PhenomiR2.0                         |
| 10   | hsa-let-7i   | PhenomiR2.0            | 25   | hsa-mir-372  | PhenomiR2.0                         |
| 11   | hsa-let-7g   | PhenomiR2.0            | 26   | hsa-mir-137  | PhenomiR2.0                         |
| 12   | hsa-mir-10b  | PhenomiR2.0            | 27   | hsa-mir-302c | PhenomiR2.0                         |
| 13   | hsa-mir-125a | PhenomiR2.0            | 28   | hsa-mir-26b  | miRCancer, PhenomiR2.0, miR2Disease |
| 14   | hsa-mir-199b | miRCancer, PhenomiR2.0 | 29   | hsa-mir-212  | miRCancer, PhenomiR2.0              |
| 15   | hsa-mir-429  | miRCancer              | 30   | hsa-mir-302a | miRCancer, PhenomiR2.0              |
